# Supplementary material
Source: PubMed Central journal article supplement (PMC5036862)
Supplement: supp_gzw013_gzw013supp.pdf [file supp_gzw013_gzw013supp.pdf]

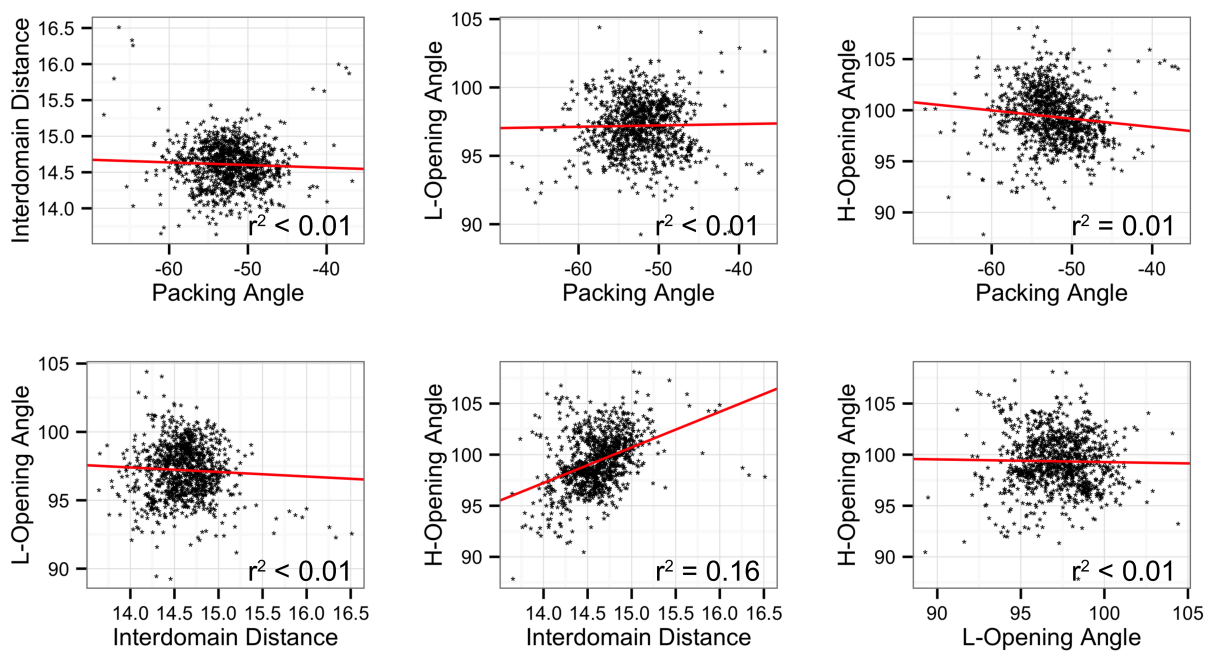

**Figure S1:** Pairwise distributions of each pair of LHOC metrics across the 1,040 structures in the Rosetta antibody database. A best-fit line (red) is drawn through each pairwise distribution, with its corresponding  $r^2$  value labeled.

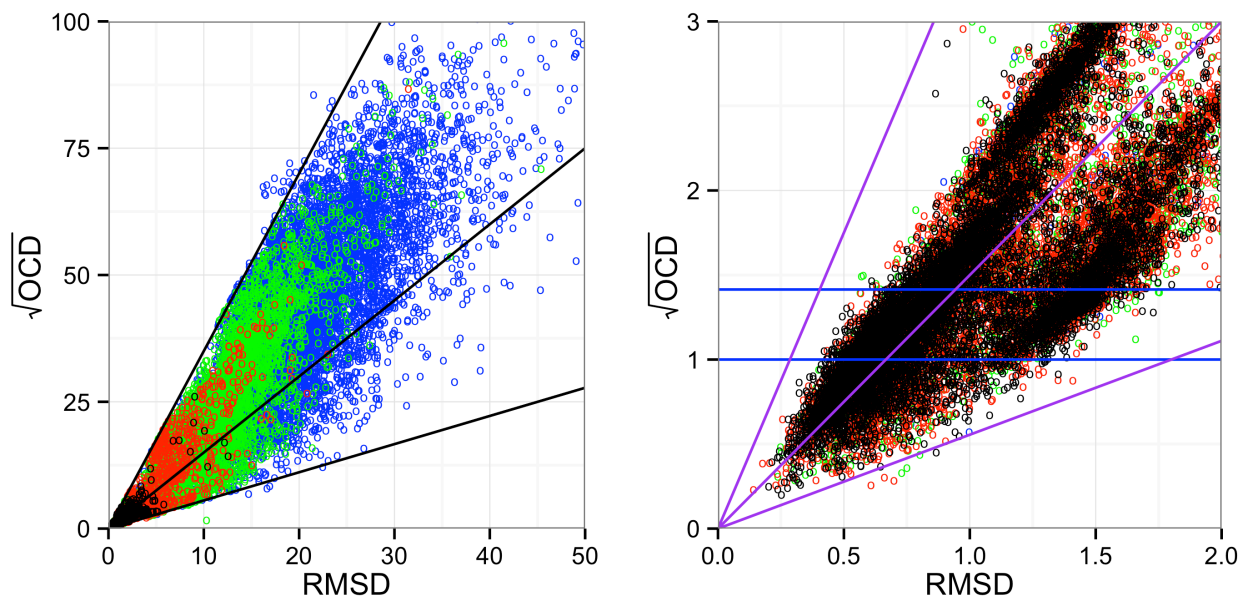

**Figure S2:** Correlation of OCD and RMSD in 40,000 candidate structures from rigid-body  $V_L$ – $V_H$  docking of a 1DLF homology model. To linearize the correlation, the square root of OCD is plotted against RMSD. The different colors represent the scale of perturbations in the docking simulations (blue > green > red > black, corresponding to size of rotations and translations). Zero-intercept lines highlight the center and the bounds of the correlation, and their slopes are noted. Horizontal lines corresponding to OCD values of 1.0 and 2.0 are also shown. The data are plotted over the RMSD ranges 0 Å–50 Å (left) and 0 Å–2 Å (right).

**Table S3:** Summary of the performance of the full ST, MT, bMT, and rMT RosettaAntibody protocols for each of the 46 benchmark antibodies. Target totals represent the number of targets in the benchmark set for which a given protocol achieved a given threshold of success. The four success thresholds are: (1) a single sub-2.0 OCD grafted structure, (2) a single sub-1.0 OCD candidate structure, (3) at least 100 sub-2.0 OCD candidate structures, and (4) at least 10 sub-1.0 OCD candidate structures. The grafted models for the MT and rMT protocols are identical, so the rMT column was omitted from this portion of the table.

| Target        | OCD, grafted model        |           | Lowest OCD candidate structure |       |       |       | Sub-2.0 OCD candidate structures |      |     |     | Sub-1.0 OCD candidate structures |     |     |     |
|---------------|---------------------------|-----------|--------------------------------|-------|-------|-------|----------------------------------|------|-----|-----|----------------------------------|-----|-----|-----|
|               | ST                        | MT (best) | ST                             | MT    | bMT   | rMT   | ST                               | MT   | bMT | rMT | ST                               | MT  | bMT | rMT |
| 1dlf          | 15.60                     | 8.21      | 1.09                           | 0.42  | 0.46  | 0.42  | 5                                | 73   | 22  | 26  | 0                                | 15  | 5   | 4   |
| 1fns          | 3.14                      | 1.91      | 0.22                           | 0.08  | 0.08  | 0.08  | 302                              | 999  | 354 | 348 | 47                               | 341 | 132 | 119 |
| 1gig          | 2.97                      | 1.05      | 0.53                           | 0.10  | 0.10  | 0.10  | 103                              | 285  | 120 | 107 | 18                               | 72  | 39  | 34  |
| 1jfq          | 2.52                      | 0.64      | 0.45                           | 0.22  | 0.24  | 0.24  | 93                               | 451  | 172 | 163 | 5                                | 72  | 26  | 28  |
| 1jpt          | 5.76                      | 0.17      | 0.08                           | 0.06  | 0.06  | 0.06  | 809                              | 1593 | 598 | 568 | 472                              | 665 | 261 | 252 |
| 1mfa          | 6.25                      | 4.89      | 0.59                           | 0.52  | 0.51  | 0.52  | 28                               | 78   | 43  | 38  | 5                                | 8   | 4   | 6   |
| 1mlb          | 4.48                      | 1.07      | 0.50                           | 0.10  | 0.10  | 0.22  | 179                              | 620  | 290 | 231 | 23                               | 142 | 71  | 65  |
| 1mqk          | 2.84                      | 1.32      | 0.07                           | 0.04  | 0.13  | 0.04  | 340                              | 841  | 392 | 294 | 94                               | 280 | 140 | 101 |
| 1nlb          | 7.02                      | 0.97      | 0.32                           | 0.12  | 0.31  | 0.12  | 69                               | 201  | 60  | 70  | 14                               | 50  | 14  | 23  |
| 1oaq          | 4.78                      | 1.20      | 0.31                           | 0.10  | 0.10  | 0.18  | 84                               | 314  | 76  | 102 | 23                               | 73  | 13  | 24  |
| 1seq          | 0.60                      | 0.60      | 0.30                           | 0.06  | 0.06  | 0.24  | 304                              | 717  | 236 | 262 | 33                               | 151 | 58  | 70  |
| 2adf          | 2.38                      | 1.03      | 0.29                           | 0.15  | 0.22  | 0.15  | 153                              | 323  | 96  | 107 | 36                               | 73  | 20  | 24  |
| 2d7t          | 20.47                     | 15.18     | 2.93                           | 1.55  | 2.93  | 2.29  | 0                                | 1    | 0   | 0   | 0                                | 0   | 0   | 0   |
| 2e27          | 6.70                      | 1.52      | 1.11                           | 0.68  | 0.98  | 1.13  | 18                               | 41   | 15  | 15  | 0                                | 3   | 1   | 0   |
| 2fb4          | 7.56                      | 1.12      | 1.04                           | 0.11  | 0.19  | 0.11  | 7                                | 152  | 67  | 55  | 0                                | 24  | 11  | 11  |
| 2fbj          | 9.96                      | 0.85      | 1.12                           | 0.10  | 0.10  | 0.36  | 7                                | 258  | 60  | 84  | 0                                | 77  | 16  | 27  |
| 2r8s          | 0.99                      | 0.33      | 0.07                           | 0.07  | 0.10  | 0.15  | 550                              | 773  | 245 | 255 | 228                              | 304 | 94  | 99  |
| 2v17          | 10.83                     | 3.12      | 0.22                           | 0.16  | 0.16  | 0.34  | 83                               | 396  | 192 | 145 | 26                               | 90  | 46  | 30  |
| 2vxv          | 0.45                      | 0.45      | 0.12                           | 0.12  | 0.12  | 0.12  | 775                              | 1193 | 480 | 405 | 360                              | 425 | 169 | 144 |
| 2xwt          | 0.85                      | 0.85      | 0.04                           | 0.04  | 0.04  | 0.10  | 467                              | 880  | 381 | 341 | 137                              | 261 | 101 | 96  |
| 2ypv          | 8.09                      | 3.33      | 0.41                           | 0.41  | 0.82  | 0.41  | 22                               | 90   | 27  | 45  | 7                                | 10  | 2   | 5   |
| 3e8u          | 4.02                      | 1.30      | 0.03                           | 0.03  | 0.03  | 0.03  | 432                              | 1220 | 446 | 433 | 150                              | 504 | 180 | 173 |
| 3eo9          | 4.45                      | 2.55      | 0.03                           | 0.03  | 0.29  | 0.13  | 243                              | 620  | 231 | 239 | 43                               | 102 | 30  | 48  |
| 3g5y          | 2.57                      | 1.52      | 0.38                           | 0.10  | 0.10  | 0.13  | 403                              | 805  | 266 | 288 | 38                               | 170 | 46  | 62  |
| 3giz          | 5.36                      | 0.91      | 0.96                           | 0.36  | 0.36  | 0.36  | 2                                | 60   | 10  | 25  | 1                                | 11  | 1   | 4   |
| 3gnm          | 2.55                      | 0.53      | 0.07                           | 0.04  | 0.04  | 0.11  | 220                              | 1127 | 447 | 396 | 69                               | 367 | 149 | 129 |
| 3go1          | 2.22                      | 0.26      | 0.10                           | 0.06  | 0.06  | 0.06  | 169                              | 326  | 162 | 103 | 45                               | 97  | 49  | 31  |
| 3hc4          | 10.99                     | 2.13      | 1.61                           | 0.13  | 0.47  | 0.13  | 2                                | 57   | 22  | 14  | 0                                | 7   | 5   | 3   |
| 3hnt          | 4.56                      | 1.46      | 0.43                           | 0.14  | 0.14  | 0.20  | 90                               | 665  | 280 | 246 | 15                               | 220 | 100 | 77  |
| 3i9g          | 0.29                      | 0.29      | 0.05                           | 0.05  | 0.05  | 0.05  | 569                              | 710  | 417 | 243 | 367                              | 390 | 235 | 136 |
| 3liz          | 8.47                      | 1.18      | 0.38                           | 0.18  | 0.29  | 0.18  | 24                               | 424  | 187 | 144 | 3                                | 89  | 38  | 28  |
| 3lmj          | 2.54                      | 0.78      | 0.63                           | 0.17  | 0.46  | 0.37  | 159                              | 304  | 101 | 118 | 14                               | 42  | 14  | 20  |
| 3m8o          | 31.92                     | 15.63     | 9.06                           | 7.00  | 10.02 | 7.00  | 0                                | 0    | 0   | 0   | 0                                | 0   | 0   | 0   |
| 3mlr          | 130.15                    | 130.15    | 49.42                          | 49.42 | 50.09 | 52.15 | 0                                | 0    | 0   | 0   | 0                                | 0   | 0   | 0   |
| 3mxw          | 1.47                      | 1.20      | 0.06                           | 0.06  | 0.07  | 0.07  | 547                              | 1008 | 507 | 350 | 239                              | 342 | 205 | 115 |
| 3nps          | 7.36                      | 4.37      | 4.09                           | 2.06  | 20.6  | 2.70  | 0                                | 0    | 0   | 0   | 0                                | 0   | 0   | 0   |
| 3oz9          | 2.54                      | 2.54      | 0.65                           | 0.39  | 0.86  | 0.60  | 86                               | 214  | 90  | 88  | 5                                | 19  | 2   | 7   |
| 3p0y          | 0.13                      | 0.13      | 0.08                           | 0.08  | 0.22  | 0.14  | 274                              | 385  | 138 | 126 | 61                               | 82  | 25  | 22  |
| 3t65          | 0.71                      | 0.69      | 0.08                           | 0.01  | 0.01  | 0.08  | 628                              | 1704 | 639 | 610 | 233                              | 745 | 280 | 252 |
| 3umt          | 1.10                      | 1.10      | 0.25                           | 0.10  | 0.10  | 0.29  | 184                              | 334  | 109 | 117 | 48                               | 79  | 26  | 30  |
| 3v0w          | 3.24                      | 3.24      | 0.16                           | 0.16  | 0.22  | 0.16  | 224                              | 314  | 121 | 103 | 41                               | 62  | 26  | 21  |
| 4f57          | 10.49                     | 5.49      | 0.05                           | 0.05  | 0.05  | 0.18  | 149                              | 237  | 80  | 91  | 48                               | 63  | 20  | 22  |
| 4h0h          | 4.69                      | 1.30      | 0.62                           | 0.20  | 0.21  | 0.20  | 118                              | 471  | 124 | 165 | 7                                | 73  | 12  | 30  |
| 4h20          | 0.32                      | 0.32      | 0.16                           | 0.10  | 0.13  | 0.10  | 465                              | 1046 | 468 | 372 | 155                              | 280 | 131 | 101 |
| 4hpy          | 0.54                      | 0.54      | 0.32                           | 0.17  | 0.17  | 0.30  | 247                              | 450  | 251 | 160 | 18                               | 58  | 31  | 17  |
| 4nzu          | 1.11                      | 1.11      | 0.03                           | 0.03  | 0.09  | 0.03  | 544                              | 1154 | 444 | 408 | 171                              | 378 | 142 | 134 |
| Target Totals | Best Graft $\leq$ 2.0 OCD |           | Best Structure $\leq$ 1.0 OCD  |       |       |       | $\geq$ 100 Sub-2.0 OCD Models    |      |     |     | $\geq$ 10 Sub-1.0 OCD Models     |     |     |     |
|               | 12                        | 33        | 37                             | 42    | 42    | 41    | 27                               | 36   | 29  | 31  | 30                               | 39  | 35  | 35  |
